# Supplementary material
Source: PubMed Central journal article supplement (PMC4827275)
Supplement: Supp_Data.pdf [file Supp_Data.pdf]

## Supplementary Data

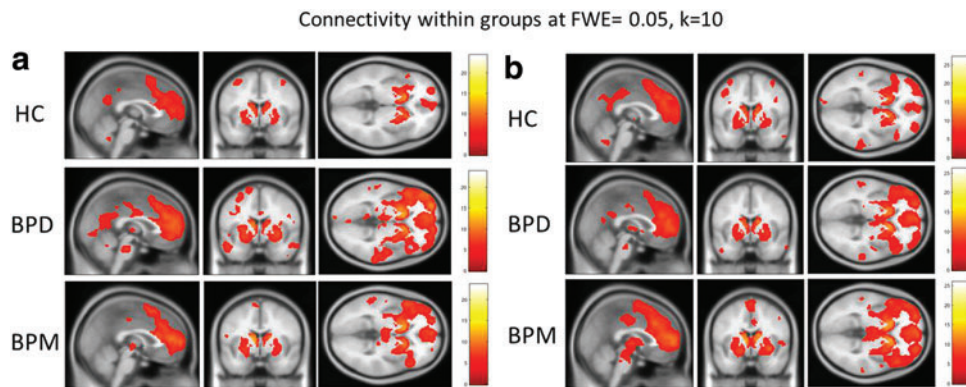

**SUPPLEMENTARY FIG. S1.** DC connectivity at voxelwise FWE corrected  $p=0.05$ ,  $k=10$ . **(a)** Left DC connectivity within groups at FWE=0.05,  $k=10$ . **(b)** Right DC connectivity within groups at FWE=0.05,  $k=10$ . DC, dorsal caudate; FWE, family-wise-error.

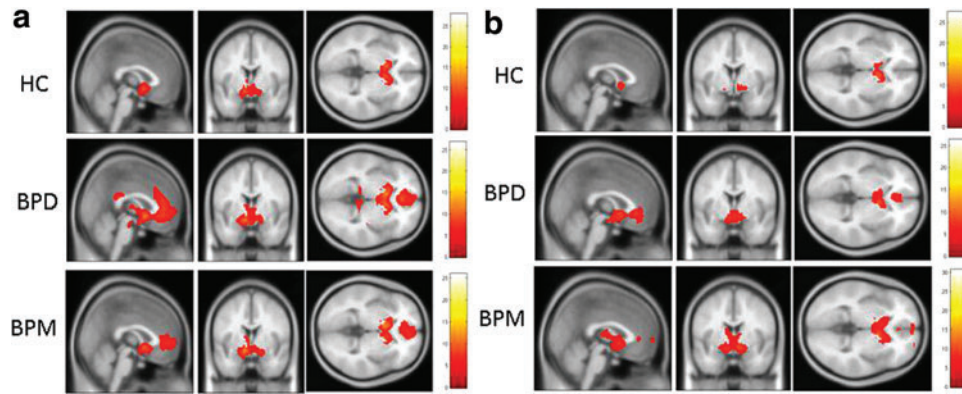

**SUPPLEMENTARY FIG. S2.** VSI (ventral caudate/nucleus accumbens) connectivity at voxelwise FWE corrected  $p=0.05$ ,  $k=10$ . **(a)** Left VSI (ventral caudate/nucleus accumbens inferior) connectivity within groups at FWE=0.05,  $k=10$ . **(b)** Right VSI (ventral caudate/nucleus accumbens inferior) connectivity within groups at FWE=0.05,  $k=10$ . VSI, ventral striatum inferior.

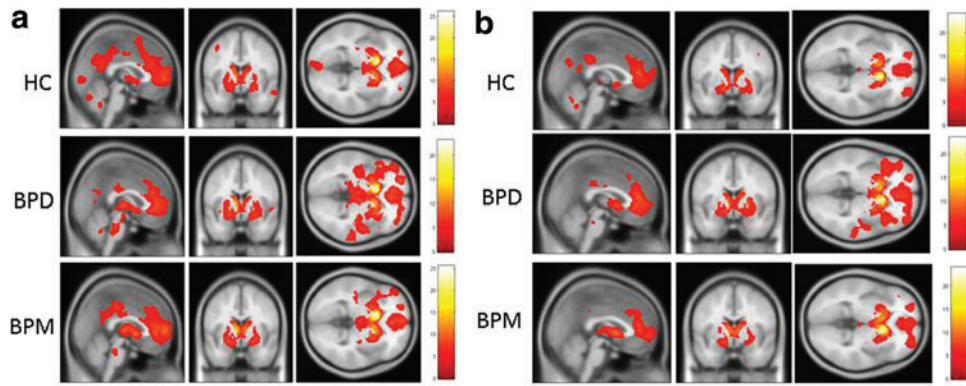

**SUPPLEMENTARY FIG. S3.** VSS connectivity at FWE voxelwise corrected  $p=0.05$ ,  $k=10$ . **(a)** Left VSS (ventral caudate superior) connectivity within groups at FWE=0.05,  $k=10$ . **(b)** Right VSS (ventral caudate superior) connectivity within groups at FWE=0.05,  $k=10$ . VSS, ventral striatum superior.

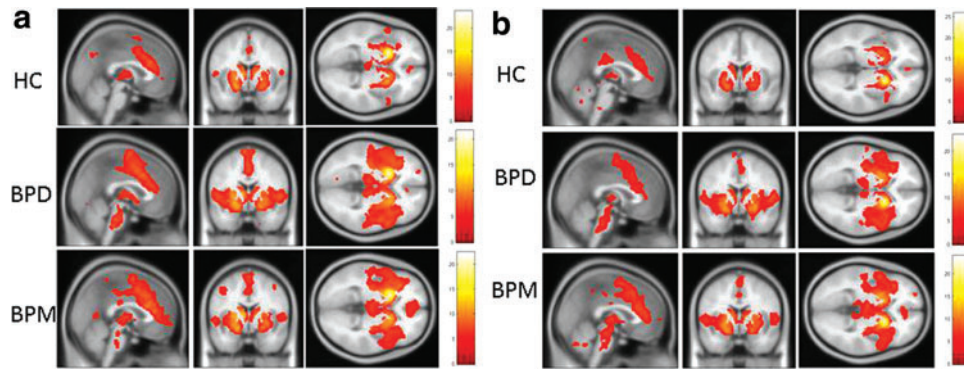

**SUPPLEMENTARY FIG. S4.** VRP connectivity at voxelwise FWE corrected  $p=0.05$ ,  $k=10$ . **(a)** Left VRP connectivity within groups at FWE=0.05,  $k=10$ . **(b)** Right VRP connectivity within groups at FWE=0.05,  $k=10$ . VRP, ventral rostral putamen.

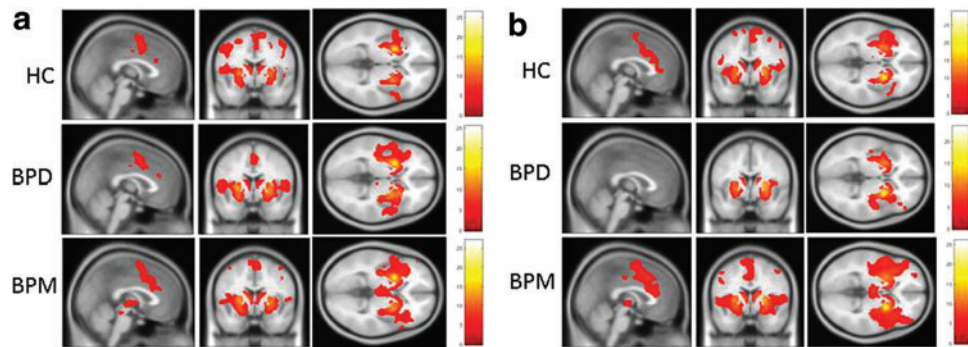

**SUPPLEMENTARY FIG. S5.** DRP connectivity at voxelwise FWE corrected  $p=0.05$ ,  $k=10$ . **(a)** Left DRP connectivity within groups at FWE=0.05,  $k=10$ . **(b)** Right DRP connectivity within groups at FWE=0.05,  $k=10$ . DRP, dorsal rostral putamen.

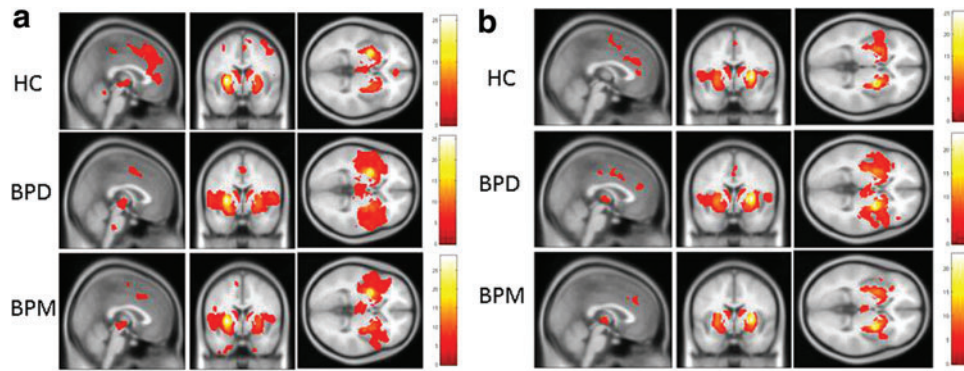

**SUPPLEMENTARY FIG. S6.** DCP connectivity at voxelwise FWE corrected  $p=0.05$ ,  $k=10$ . **(a)** Left DCP connectivity within groups at FWE=0.05,  $k=10$ . **(b)** Right DCP connectivity within groups at FWE=0.05,  $k=10$ . DCP, dorsal caudal putamen.
